# Supplementary material for: Spectroscopic characterization of uranium atoms in uranium-dioxide laser-produced plasma in a high-vacuum environment
Source: Royal Society of Chemistry journal article supplement (doi:10.1039/d4ja00189c), 2024-12-04
Supplement: d4ja00189c1.pdf [file d4ja00189c1.pdf]

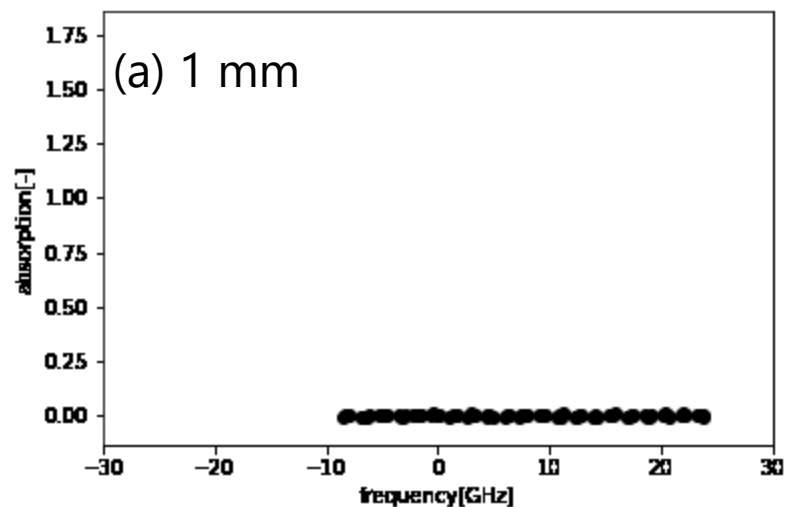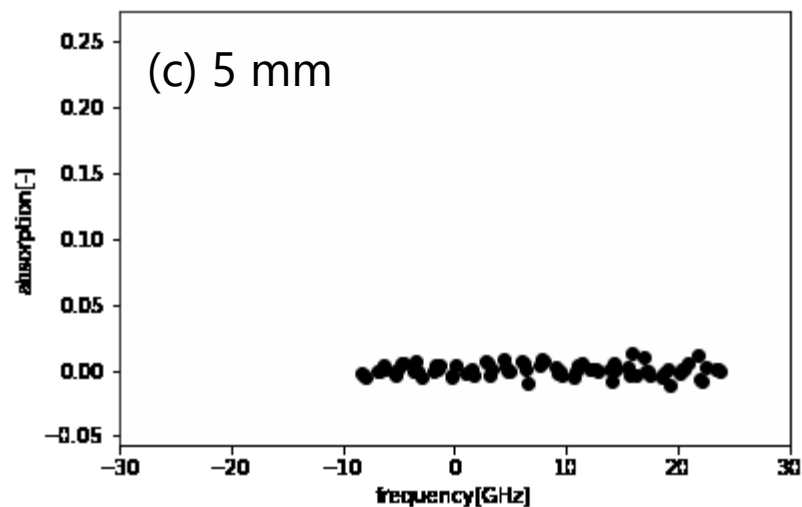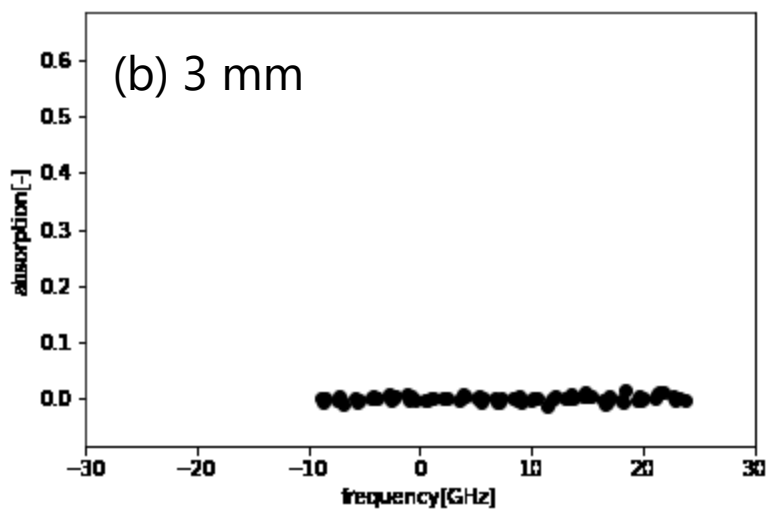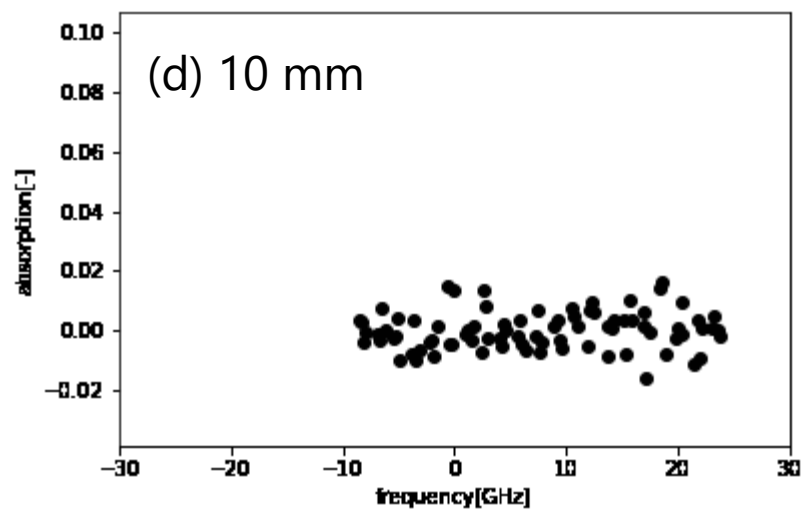

Temporal spectral variations of U atoms in the  $^5L_6$  ground state. The time resolution is 50 ns and the interval of each image is 100 ms.
